# Supplementary material
Source: PubMed Central journal article supplement (PMC8742761)
Supplement: NIHMS1737691-supplement-supinfo.pdf [file NIHMS1737691-supplement-supinfo.pdf]

**Supplementary Table S1** Risk-adjusted advance care planning, treatment intensity (ICU and MV), DNR status, and mortality among hospitalized dementia patients with COVID-19 March-June 2020, compared to hospitalized non-dementia patients, by tercile of hospital ACP billing frequency (low, medium, high)

| Dependent Variable  | No Dementia | Dementia | OR  | LB 95% CI | UB 95% CI | p-value |
|---------------------|-------------|----------|-----|-----------|-----------|---------|
| ACP                 | 17%         | 26%      | 1.8 | 1.4       | 2.3       | <0.0001 |
| Low                 | 3%          | 8%       | 3.2 | 1.7       | 6.1       | <0.0001 |
| Medium              | 14%         | 25%      | 2.0 | 1.3       | 3.2       | 0.003   |
| High                | 31%         | 41%      | 1.6 | 1.2       | 2.2       | 0.003   |
| Intensive care unit | 28%         | 26%      | 0.9 | 0.7       | 1.2       | 0.487   |
| Low                 | 29%         | 21%      | 0.6 | 0.4       | 0.9       | 0.016   |
| Medium              | 25%         | 29%      | 1.3 | 0.8       | 2.0       | 0.308   |
| High                | 29%         | 29%      | 1.0 | 0.7       | 1.5       | 0.800   |
| Mech Vent           |             |          |     |           |           |         |
| Low                 | 16%         | 6%       | 0.3 | 0.2       | 0.7       | 0.001   |
| Medium              | 16%         | 13%      | 0.9 | 0.5       | 1.5       | 0.613   |
| High                | 16%         | 16%      | 1.0 | 0.7       | 1.6       | 0.825   |
| DNR order           |             |          |     |           |           |         |
| Low                 | 21%         | 48%      | 3.9 | 2.7       | 5.6       | <0.0001 |
| Medium              | 22%         | 55%      | 4.7 | 3.0       | 7.4       | <0.0001 |
| High                | 21%         | 43%      | 3.0 | 2.1       | 4.1       | <0.0001 |
| Mortality           |             |          |     |           |           |         |
| Low                 | 12%         | 19%      | 1.8 | 1.2       | 2.8       | 0.005   |
| Medium              | 15%         | 18%      | 1.3 | 0.8       | 2.1       | 0.387   |
| High                | 13%         | 19%      | 1.6 | 1.1       | 2.2       | 0.016   |
